# Supplementary material for: Magnetic Resonance Imaging Measurements of the Proximal Palmar Cortex of the Third Metacarpal Bone and the Suspensory Ligament in Non-Lame Endurance Horses before and after Six Months of Training
Source: Animals (Basel). 2023 Mar 20;13(6):1106. doi: 10.3390/ani13061106 (PMC10044202; doi:10.3390/ani13061106)
Supplement: Supplementary file 1 [file animals-13-01106-s001.zip › TABLE S1_before Table S2_09.03.2023.pdf]

**Table S1.** Results of the independent samples t-test comparing the thickness of the palmar cortex of the third metacarpal bone (PcMcIII) between novice (n=6) and experienced (n = 6) endurance horses at 2, 3 5 and 7 cm distal to the carpometacarpal joint (CMCJ); 25%, 50%, 75% of the mediolateral width of the of the PcMIII, pre-season = 1st examination (n = 12), post-season = 2<sup>nd</sup> examination (n = 11), SD – standard deviation; MD – mean difference; CI– confidence intervals. \* = statistically significant,  $p < 0.05$ .

|                     | Novice       |            | Experienced  |            | MD [mm] | p value | 95% CI [mm] |
|---------------------|--------------|------------|--------------|------------|---------|---------|-------------|
|                     | Mean<br>[mm] | SD<br>[mm] | Mean<br>[mm] | SD<br>[mm] |         |         |             |
| Pre-season          |              |            |              |            |         |         |             |
| 2 cm distal to CMCJ |              |            |              |            |         |         |             |
| 25% PcMcIII         | 2.7          | 0.8        | 4.0          | 1.1        | 1.2     | <0.01*  | 0.5-2.0     |
| 50 % PcMcIII        | 2.5          | 0.9        | 3.7          | 1.1        | 1.1     | <0.01*  | 0.3, 2.0    |
| 75% PcMcIII         | 2.5          | 0.8        | 2.7          | 0.9        | 0.2     | 0.48    | -0.5, 1.0   |
| 3 cm distal to CMCJ |              |            |              |            |         |         |             |
| 25% PcMcIII         | 3.9          | 1.1        | 5.1          | 0.6        | 1.2     | <0.01*  | 0.4, 1.9    |
| 50 % PcMcIII        | 3.8          | 1.0        | 4.8          | 0.9        | 1.0     | 0.02*   | 0.1, 1.8    |
| 75% PcMcIII         | 3.6          | 0.8        | 3.5          | 0.5        | -0.1    | 0.68    | -0.7, 0.5   |
| 5 cm distal to CMCJ |              |            |              |            |         |         |             |
| 25% PcMcIII         | 4.5          | 1.2        | 5.2          | 0.9        | 0.7     | 0.14    | -0.2, 1.6   |
| 50 % PcMcIII        | 4.3          | 1.1        | 4.6          | 0.8        | 0.3     | 0.42    | 0.0, 1.1    |
| 75% PcMcIII         | 4.3          | 0.9        | 4.4          | 1.0        | 0.1     | 0.70    | -0.7, 1.0   |
| 7cm distal to CMCJ  |              |            |              |            |         |         |             |
| 25% PcMcIII         | 5.7          | 1.3        | 5.7          | 1.2        | 0.0     | 0.94    | -1.0, 1.1   |
| 50 % PcMcIII        | 5.3          | 1.3        | 5.4          | 1.1        | 0.0     | 0.95    | -1.0, 1.0   |
| 75% PcMcIII         | 5.5          | 1.2        | 5.4          | 1.2        | -0.2    | 0.73    | -1.2, 0.8   |
| Post-season         |              |            |              |            |         |         |             |
| 2 cm distal to CMCJ |              |            |              |            |         |         |             |
| 25% PcMcIII         | 3.1          | 0.7        | 4.0          | 0.8        | 0.9     | 0.01*   | 0.3, 1.6    |
| 50 % PcMcIII        | 3.0          | 0.9        | 3.5          | 1.1        | 0.6     | 0.18    | -0.3, 1.5   |
| 75% PcMcIII         | 2.5          | 0.6        | 3.0          | 0.9        | 0.5     | 0.14    | -0.2, 1.2   |
| 3 cm distal to CMCJ |              |            |              |            |         |         |             |
| 25% PcMcIII         | 3.5          | 1.0        | 4.8          | 0.8        | 1.4     | <0.01*  | 0.6, 2.2    |
| 50 % PcMcIII        | 3.5          | 0.8        | 4.6          | 0.8        | 1.2     | <0.01*  | 0.4, 1.9    |
| 75% PcMcIII         | 3.1          | 0.8        | 3.4          | 0.9        | 0.3     | 0.43    | -0.5, 1.1   |
| 5 cm distal to CMCJ |              |            |              |            |         |         |             |
| 25% PcMcIII         | 4.5          | 0.8        | 4.7          | 1.1        | 0.2     | 0.67    | -0.6, 1.0   |
| 50 % PcMcIII        | 4.2          | 0.8        | 4.4          | 1.1        | 0.1     | 0.75    | -0.7, 1.0   |
| 75% PcMcIII         | 4.4          | 0.6        | 4.3          | 0.9        | 0.0     | 0.93    | -0.7, 0.64  |
| 7 cm distal to CMCJ |              |            |              |            |         |         |             |
| 25% PcMcIII         | 5.3          | 1.2        | 5.1          | 1.6        | -0.2    | 0.71    | -1.5, 1.0   |
| 50 % PcMcIII        | 5.2          | 1.0        | 4.8          | 1.6        | -0.3    | 0.55    | -1.5, 0.8   |
| 75% PcMcIII         | 5.3          | 0.7        | 4.7          | 1.5        | -0.6    | 0.30    | -1.7, 0.5   |
